# Supplementary material for: Classification of triple-negative breast cancers based on Immunogenomic profiling
Source: Springer Nature journal article supplement (doi:10.1186/s13046-018-1002-1), 2018-12-01

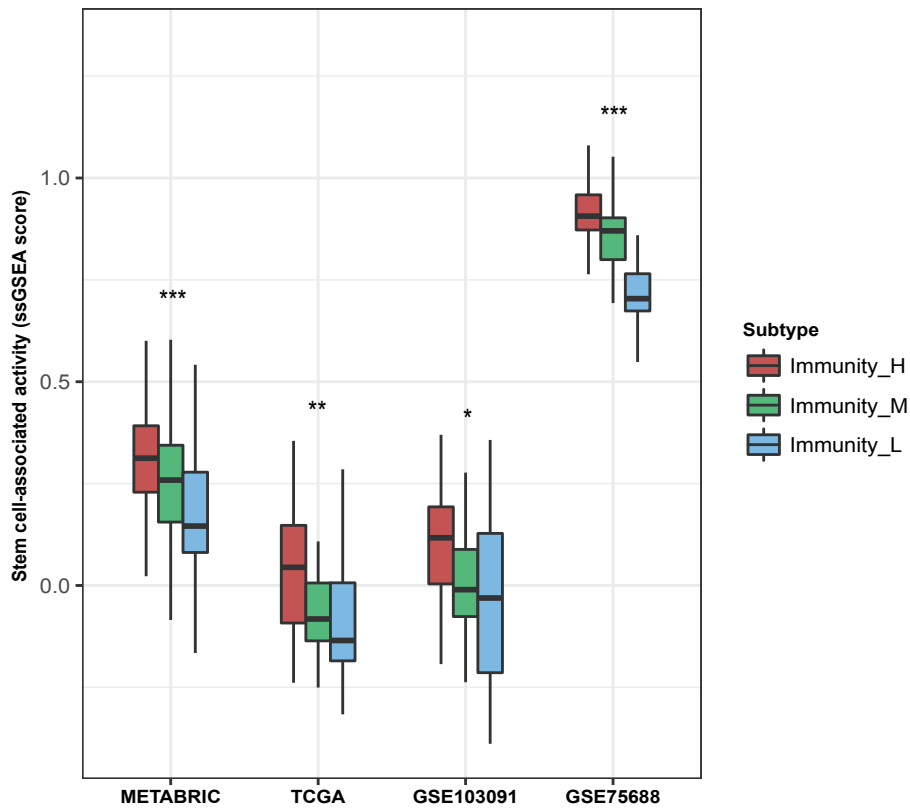

Supplement: MOESM5 [file 16362898]
